# 1 Intravital quantification of absolute cytoplasmic B cell calcium reveals dynamic 2 signaling across B cell differentiation stages

3 Carolin Ulbricht<sup>1,2</sup>, Ruth Leben<sup>2</sup>, Asylkhan Rakhymzhan<sup>2</sup>, Frank Kirchhoff<sup>3</sup>, Lars Nitschke<sup>4</sup>,  
4 Helena Radbruch<sup>1</sup>, Raluca A Niesner<sup>5,2\*</sup>, Anja E Hauser<sup>1,2\*</sup>

5  
6 <sup>1</sup>Charité - Universitätsmedizin Berlin

7 <sup>2</sup>Deutsches Rheuma-Forschungszentrum Berlin, ein Institut der Leibniz-Gemeinschaft

8 <sup>3</sup>Universität des Saarlandes, Homburg

9 <sup>4</sup>Friedrich-Alexander-Universität Erlangen-Nürnberg

10 <sup>5</sup>Freie Universität Berlin

11

12 \*equal contribution

13 Correspondence to: Anja Hauser, [anja.hauser-hankeln@charite.de](mailto:anja.hauser-hankeln@charite.de), [hauser@drfz.de](mailto:hauser@drfz.de)

## 14 Abstract

15 Development, function and maintenance of lymphocytes largely depend upon the cellular  
16 mobilization and storage of Ca<sup>2+</sup> ions. In B lymphocytes, the absolute amount of calcium  
17 mobilized and retained after cell signaling remains unknown, although it is a crucial part of  
18 their selection within germinal centers and differentiation into plasma cells. Here, we  
19 introduce the novel reporter mouse strain YellowCaB that expresses the genetically encoded  
20 calcium indicator TN-XXL in CD19<sup>+</sup> lymphocytes. The construct consists of the electron-  
21 donor fluorophore eCFP and the acceptor citrine, linked by a calcium sensitive domain. Its  
22 conformation and therefore donor quenching is directly linked to cytosolic calcium  
23 concentrations. By combining intravital two-photon fluorescence lifetime microscopy with our  
24 numerical approach for phasor-based analysis, we are able to extract absolute cytoplasmic  
25 calcium concentrations in activated B cells for the first time *in vivo*. We show that calcium  
26 concentrations in B cells are highly dynamic and fluctuations persist in extrafollicular B cells  
27 with functional relevance.

## 28 Introduction

29 The capacity of the immune system to produce a variety of different antibodies and to further  
30 fine-tune their affinity to bind antigen (AG) upon pathogen challenge is one of the pillars of  
31 adaptive humoral immunity. Fine-tuning is achieved by somatic hypermutation of  
32 immunoglobulin genes, followed by a T cell-aided selection process, which B cells undergo  
33 within germinal centers (GC). This eventually results in a pool of high affinity memory B cells  
34 and long-lived plasma cells<sup>1-3</sup>. B cells encounter and take up membrane-bound AG in the  
35 form of immune complexes on follicular dendritic cells (FDCs) in GCs. This leads to B cell  
36 receptor (BCR) activation and calcium influx into the cell<sup>4</sup>. This eventually switches on

37 effector proteins and transcription factors like nuclear factor kappa B (NF- $\kappa$ B), nuclear factor  
38 of activated T cells (NFAT), or Myelocytomatosis oncogene cellular homolog (c-Myc),  
39 thereby activating the B cells, inducing differentiation events and remodeling of metabolic  
40 requirements<sup>5–10</sup>. BCR-affinity dependent AG-capture has been thought to serve solemnly  
41 the processing and MHCII-dependent presentation to follicular helper T cells and that  
42 signaling is dampened<sup>11</sup>. However, newer studies show that BCR activated calcium signaling  
43 has to precede T cell derived signals and that the latter have to occur within a limited period  
44 of time after initial BCR activation<sup>12</sup>. Changes in cytoplasmic calcium concentration thus  
45 could provide a mechanistic link between BCR signal strength, the switch-on of downstream  
46 effector processes and their temporal regulation.

47 In contrast to qualitative description, absolute quantification of cytosolic calcium has not been  
48 achieved yet, partly because of the lack of internal concentration standards. Two-fluorophore  
49 Förster resonance energy transfer (FRET)-GECI, that can take on a calcium-saturated  
50 (quenched) and calcium-unsaturated (unquenched) condition, could overcome this, however,  
51 its intravital application has been hampered by light distortion effects in deeper tissue. The  
52 differential scattering and photobleaching properties of the two fluorophores would lead to a  
53 false bias towards a higher quenching state. We here introduce a single-cell fluorescence  
54 lifetime imaging (FLIM) approach for absolute calcium quantification in living organisms that  
55 is tissue depth-independent. The eCFP/citrine-FRET pair-GECI TN-XXL is able to measure  
56 fluctuations in cytoplasmic calcium concentration through the calcium binding property of the  
57 muscle protein Troponin C (TnC)<sup>13</sup>. Calcium binding to the fluorophore-linker TnC quenches  
58 eCFP fluorescence through energy scavenging by citrine, linking decreasing eCFP  
59 fluorescence lifetime to increasing calcium concentration. In addition, phasor analysis of  
60 FLIM data elegantly condenses multicomponent fluorescent decay curves into single vector-  
61 based information (the phasor)<sup>14</sup>. For calcium concentration analysis in microscopic images,  
62 we took advantage of this by projecting the phasor value in each pixel onto a given  
63 calibration<sup>15</sup>. With this method, we are able to describe short- and long-term changes in  
64 absolute calcium concentrations within B cells during affinity maturation and differentiation  
65 into antibody-producing plasma cells.

66 We here show, using our calcium reporter mouse strain “YellowCaB” (yellow fluorescence  
67 after calcium influx in B cells), which expresses cytosolic TN-XXL under control of the CD19  
68 promoter, that calcium signals are highly dynamic within different B cell populations. We  
69 analyze AG-specific and non-AG-specific extrafollicular and GC B cells as well as AG-  
70 specific extrafollicular plasma blasts. We describe highly dynamic signaling patterns that  
71 differ in amplitude and baseline and correlate with cellular differentiation stages.

## 72 **Results**

### 73 **YellowCaB: A system for FRET-based calcium analysis in B cells**

74 By breeding mice expressing a loxP-flanked STOP sequence followed by the TN-XXL-  
75 construct inserted into the ROSA26 locus together with the CD19-Cre strain<sup>16</sup>, we generated  
76 offspring with exclusive and visible expression of the FRET fluorophore pair eCFP and citrine  
77 in CD19<sup>+</sup> B lymphocytes, as confirmed by confocal microscopy after magnetic B cell isolation  
78 (Fig 1a and b). YellowCaB cells were excited with a 405nm Laser that is capable of exciting  
79 eCFP but not citrine. The detection of yellow emission thus can be attributed to baseline  
80 FRET representing steady state calcium levels. Expression of TN-XXL in YellowCaB mice  
81 was tested by flow cytometry, determining the percentage of fluorescent cells in a  
82 CD19<sup>+</sup>GFP<sup>+</sup> gate after excitation with the 488nm laser. Yellow citrine fluorescence was found  
83 to be exclusive to CD19<sup>+</sup> B lymphocytes and the expression level of TN-XXL ranged between  
84 25-45% in mice expressing the sensor on one allele (CD19<sup>cre/+</sup> TN-XXL<sup>+/-</sup>) and 70-90% in  
85 mice homozygous for the TN-XXL construct (CD19<sup>cre/+</sup> TN-XXL<sup>+/+</sup>) animals (Fig 1c and S1).  
86 When analyzing secondary lymphoid organs, no differences in total cell numbers and B cell  
87 numbers between TN-XXL<sup>+/-</sup> CD19<sup>cre/+</sup>, TN-XXL<sup>+/+</sup> CD19<sup>cre/+</sup> and wild type mice were detected  
88 (Fig S1). We next set out to test if we could induce a FRET signal change under calcium-  
89 saturating conditions in the cytoplasm. The ionophore ionomycin is commonly used as  
90 positive control in *in vitro* experiments measuring calcium concentrations, as it uncouples the  
91 increase of calcium concentration from the physiological entry sites of Ca<sup>2+</sup> ions by forming  
92 holes in the cell membrane. When stimulated with ionomycin, a steep increase of the FRET  
93 level over baseline could be recorded by flow cytometry in the GFP-channel after excitation  
94 with the 405nm laser. Calcium-dependence was independently confirmed by staining with  
95 the calcium sensitive dye X-Rhod-1 that shows a red fluorescence signal increase after  
96 calcium binding (Fig 1d)<sup>17</sup>.

97 In preparation of our intravital imaging experiments, we first needed to test if the YellowCaB  
98 system is stable enough for time-resolved microscopic measurements and sensitive enough  
99 for subtle cytoplasmic calcium concentration changes as they occur after store-operated  
100 calcium entry (SOCE). In SOCE, stimulation of the BCR with AG leads to drainage of  
101 intracellular calcium stores in the endoplasmic reticulum (ER) which triggers calcium influx  
102 from the extracellular space into the cytosol through specialized channels<sup>18</sup>. We established  
103 a customizable continuous perfusion flow chamber image system to monitor and manipulate  
104 YellowCaB cells over the duration of minutes to hours (Fig. 1e). Division of the fluorescence  
105 intensity of electron acceptor citrine by that of donor eCFP yields the FRET ratio (R), which is  
106 then put into relationship to baseline FRET levels. As citrine intensity is expected to increase  
107 and eCFP intensity is expected to decrease due to FRET, the resulting value of  $\Delta R/R$  will  
108 increase as well. As expected, we could detect a decrease of the CFP signal, concurrent with

109 an increased YFP fluorescence after the addition of 4 $\mu$ g/ml ionomycin to continuous flow of  
 110 6mM Krebs-Ringer solution. Overall, this resulted in a maximal elevation of  $\Delta R/R$  of 50-55%  
 111 over baseline (Fig. 1f). Analysis of >100 cells showed that approximately in three quarters of  
 112 the cells we were able to detect FRET in response to ionomycin treatment, and that the  
 113 majority of these cells showed 35-40% FRET signal change. According to the two  
 114 populations visible in the histogram, we defined a change of 20%  $\Delta R/R$  as a relevant  
 115 threshold for the positive evaluation of responsiveness (Fig. 1g). In conclusion, we achieve  
 116 the functional and well tolerated expression of TN-XXL exclusively in murine CD19<sup>+</sup> B cells  
 117 for measurement of changes of cytoplasmic calcium concentrations. Moreover, flow  
 118 cytometric and microscopic long-term calcium analysis are possible.

119

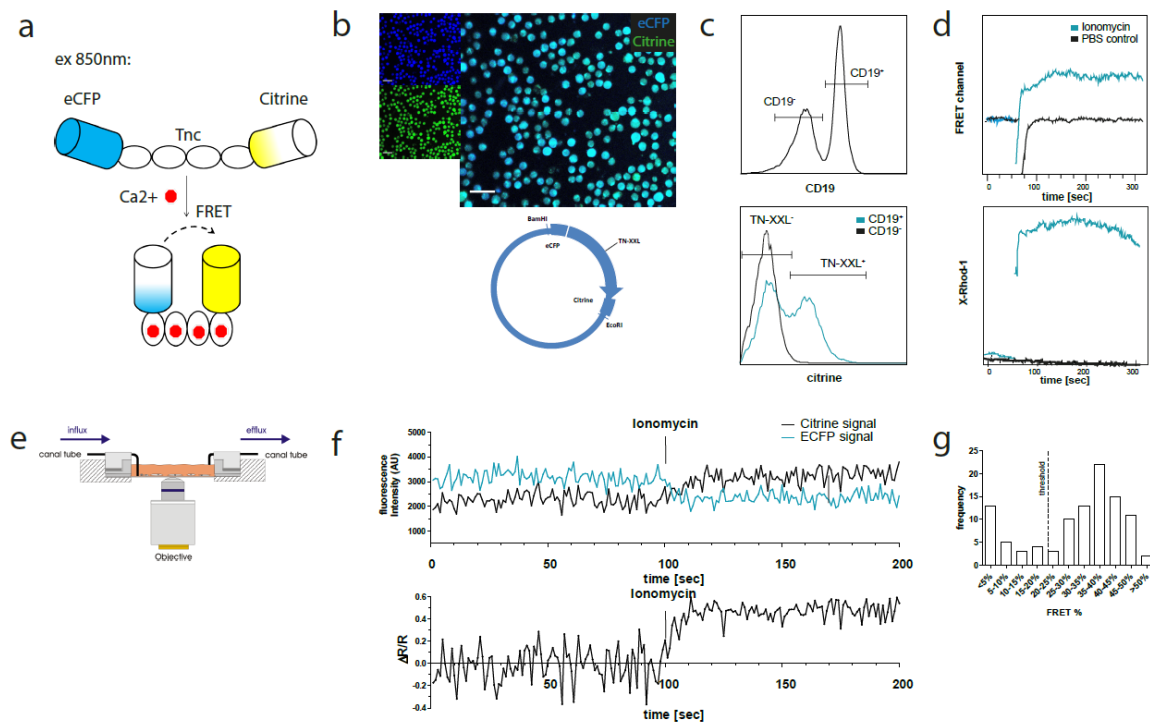

120

121 Fig. 1 The GEI TN-XXL is functionally expressed in CD19<sup>+</sup> B cells of YellowCaB mice. a Schematic representation of the  
 122 genetically encoded calcium indicator TN-XXL with calcium sensitive domain TnC fused to donor fluorophore eCFP and  
 123 acceptor fluorophore citrine. Binding of Ca<sup>2+</sup> ions within (up to) four loops of TnC leads to quenching of eCFP and Förster  
 124 resonance energy transfer to citrine. b Confocal image of freshly isolated CD19<sup>+</sup> B cells. Overlapping blue and yellow-green  
 125 fluorescence of eCFP and citrine, respectively, can be detected after cre-loxP mediated expression of the TN-XXL vector in  
 126 YellowCaB mice. c Flow cytometric analysis of TN-XXL expression among lymphocytes of YellowCaB mice. d Flow cytometric  
 127 measurement of calcium flux after addition of ionomycin and PBS control. e Continuous perfusion imaging chamber for live  
 128 cell imaging. f Confocal measurement of mean fluorescence intensity and FRET signal change after addition of ionomycin to  
 129 continuous perfused YellowCaB cells. Data representative for at least 100 cells out of three independent experiments. g  
 130 Frequency histogram of >100 YellowCaB single cells, FRET analyzed after ionomycin stimulation. Threshold chosen for  
 131 positive FRET signal change = 20% over baseline intensity.

### 132 Repeated BCR stimulation results in fluctuating cytoplasmic calcium concentrations

133 SOCE in B cells can be provoked experimentally by stimulation of the BCR with multivalent

134 AG, for example anti-Ig heavy chain F(ab)<sub>2</sub> fragments. To test the functional performance of  
135 the GECI TN-XXL in YellowCaB cells, we stimulated isolated YellowCaB cells with 10 µg/ml  
136 anti-IgM F(ab)<sub>2</sub> fragments to activate the BCR. In an open culture imaging chamber, we  
137 could induce an elevated FRET signal with a peak height of >30% that lasted over three  
138 minutes (Fig 2a). The signal declines after this time span, probably due to BCR  
139 internalization or the activity of ion pumps. We tested antibody concentrations at 2 µg/ml,  
140 4 µg/ml, 10 µg/ml and 20 µg/ml. An antibody concentration of 2 µg/ml was not enough to  
141 provoke calcium flux (data not shown), whereas at 4 µg/ml anti-IgM-F(ab)<sub>2</sub> we could observe  
142 20% elevated  $\Delta R/R$  over baseline (Fig. 2b). At 20 µg/ml anti-IgM-F(ab)<sub>2</sub> we could see no  
143 further FRET increase (Fig S2). Thus, we conclude a concentration dependency of the GECI  
144 TN-XXL and saturating conditions at 10 µg/ml BCR heavy chain stimulation. Interestingly,  
145 the reaction is not completely cut off after the FRET signal has declined, but a residual FRET  
146 signal of about 7% compared to baseline values can be measured for approximately 3.5  
147 additional minutes (Fig. 2a). Thus, B cells seem to be able to store extra calcium within the  
148 cytoplasm for some time. We therefore asked if it is possible to stimulate YellowCaB cells  
149 more than once. Indeed, we could stimulate YellowCaB cells *in vitro* repeatedly with F(ab)<sub>2</sub>-  
150 fragments of anti-IgM-antibody. For this purpose, we connected our imaging culture chamber  
151 to a peristaltic pump and took advantage of the fact that under continuous perfusion with  
152 Ringer solution, the flow will dilute the antibody out of the chamber. This way, it is possible to  
153 stimulate B cells several times rapidly and subsequently, before BCRs are internalized (Fig.  
154 2b), indicated by multiple peaks in  $\Delta R/R$ . We repeated this procedure several times and  
155 could observe this type of repetitive response up to five times. Also, stimulation of the BCR  
156 light chain using an anti-kappa antibody leads to calcium increase within YellowCaB cells  
157 (Fig. S2). Of note, the resulting FRET peak is shaped differently, and concentrations  
158 >150 µg/ml antibody were needed in order to generate a response. This might be in part due  
159 to the fact that monovalent AG is not sufficient to drive BCR activation and the light chain has  
160 different conformational properties.

161 Since T cell engagement and the binding of unspecific microbial targets to innate receptors  
162 like Toll like receptors (TLRs) have also been described to raise cytoplasmic calcium in B  
163 cells<sup>19-21</sup>, we investigated the response of YellowCaB cells after incubation with anti-CD40  
164 antibodies, as well as the TLR4 and TLR9 stimuli Lipopolysaccharide and cytosine-  
165 phosphate-guanin-rich regions of bacterial DNA (CpG), respectively. Within the same cells,  
166 we could detect no reaction to anti-CD40 treatment alone, but observed three types of  
167 shapes in post-CD40 BCR-stimulated calcium responses, that differed from anti-CD40-  
168 untreated cells (Fig. 2a). These calcium flux patterns were either sustained, transient or of an  
169 intermediate shape (Fig. 2c). Sustained calcium flux even saturated the sensor at a level  
170 comparable to that achieved by ionomycin treatment. Cells that showed only intermediate

171 flux maintained their ability to respond to ionomycin treatment at high FRET levels, as  
172 demonstrated by the  $\Delta R/R$  reaching 0.4 again after stimulation (Fig. 2c). Furthermore,  
173 integrated TLR and BCR stimulation affected the appearance of the calcium signal. The  
174 addition of TLR9 stimulus CpG alone had no effect on YellowCaB FRET levels, however, the  
175 subsequent FRET peak in response to anti-Ig-F(ab)<sub>2</sub> was delayed (Fig 2d+e). TLR4  
176 stimulation via LPS could elevate calcium concentration of B cells, but only to a minor extent  
177 (Fig 2e). Pre-BCR TLR4 stimulation by LPS lead to decreased FRET levels in response to  
178 anti-IgM-F(ab)<sub>2</sub>. We conclude that, in order to get fully activated, B cells are able to collect  
179 and integrate multiple BCR-induced calcium signals and that signaling patterns are further  
180 shaped by innate signals or T cell help. BCR-inhibition abolishes a FRET signal change in  
181 response to anti-IgM-F(ab)<sub>2</sub> (Fig S2). Of note, we excluded the possibility that measured  
182 signal changes were related to chemokine stimulation. *In vitro*, we could detect no FRET  
183 peak after applying CXCL12, probably because of lacking GECI sensitivity to small  
184 cytoplasmic changes (Fig. S2). Thus, the YellowCaB system is well suited for the detection  
185 of BCR-induced cytosolic calcium concentration changes.



186

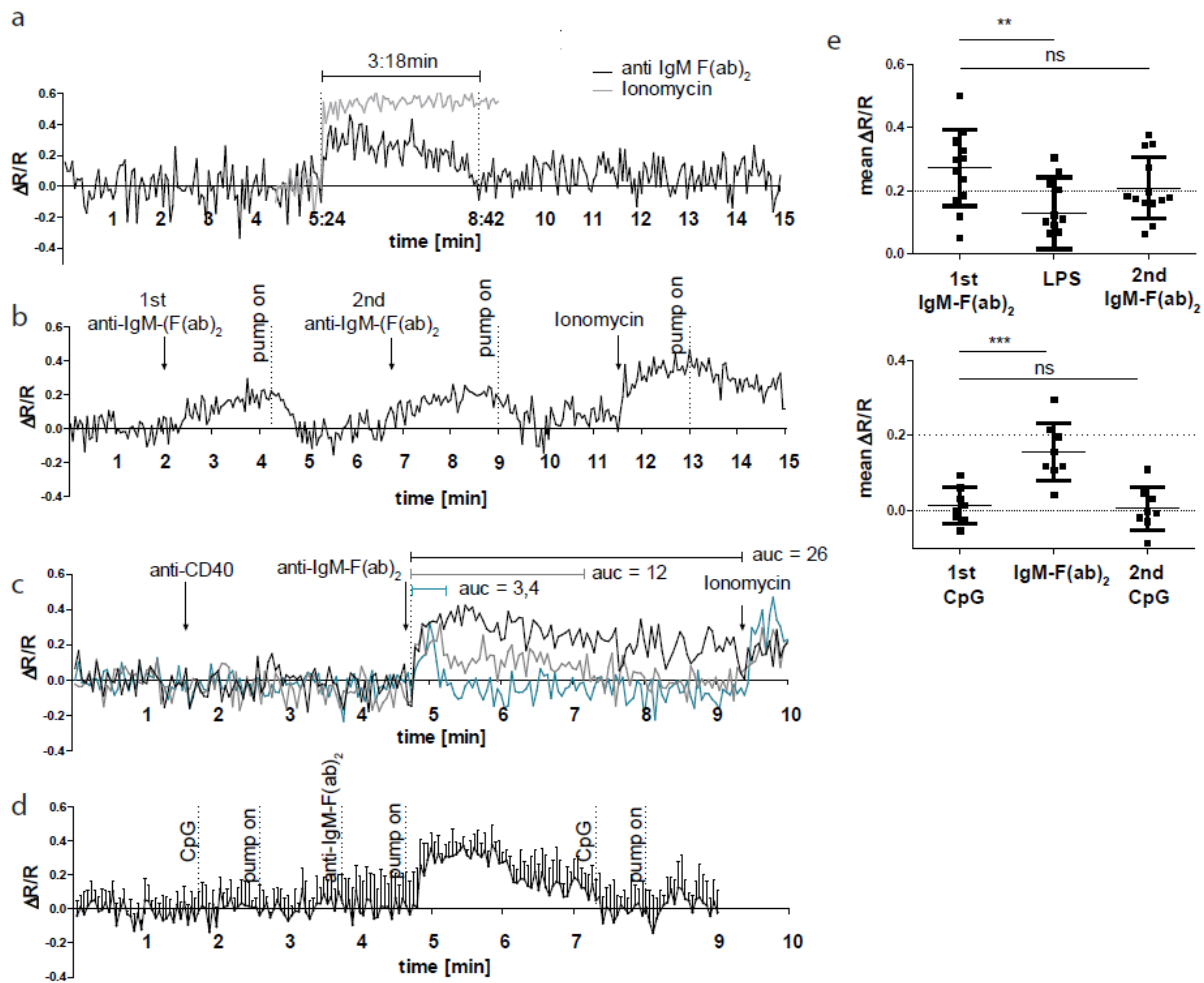

187

188 Fig. 2 BCR stimulation specifically leads to calcium mobilization in YellowCaB cells *in vitro*. a Confocal measurement of FRET  
 189 duration ( $\Delta R/R > 0$ ) in non-perfused primary polyclonal YellowCaB cells after addition 10 $\mu$ g/ml anti-IgM-F(ab)<sub>2</sub> (black),  
 190 Ionomycin control (grey). Data representative for at least 35 single cells in four independent experiments. b Confocal  
 191 measurement of FRET signal change after repeated addition of anti-IgM-F(ab)<sub>2</sub> to perfused primary polyclonal YellowCaB  
 192 cells. Data representative for at least 50 cells out of five independent experiments. c Confocal measurement of FRET signal  
 193 change after addition of anti-IgM-F(ab)<sub>2</sub> to perfused primary polyclonal YellowCaB cells following stimulation with anti-  
 194 CD40 antibody and Ionomycin positive control. Examples of transient cytoplasmic (blue), intermediate (grey) and sustained  
 195 calcium mobilization shown, area under the curve (AUC) compared. Data representative for 26 cells out of two independent  
 196 experiments. d Resulting FRET curve out for n=7 primary polyclonal YellowCaB cells perfused with TLR9 stimulator CpG in  
 197 Ringer solution and subsequent addition of anti-IgM-F(ab)<sub>2</sub>. e Mean FRET signal change over time after addition of TLR4 or  
 198 TLR9 stimulation in combination with BCR crosslinking by anti-IgM-F(ab)<sub>2</sub> in perfused polyclonal YellowCaB cells n=12  
 199 (upper) and n=8 (lower) \*\*: p=0.0086, \*\*\*: p<0.05, one-way ANOVA. Error bars: SD/mean.

## 200 Fluctuating calcium levels are observed *in vivo*

201 We next set out to investigate if the ability of B cells to collect calcium signals is also shared  
 202 by germinal center B cells, and to identify the spatial distribution of possible BCR-triggering  
 203 forces in an *in vivo* setting. For two-photon intravital imaging, nitrophenyl (NP)-specific B1-  
 204 8hi:YellowCaB cells were transferred into wild type hosts which were subsequently  
 205 immunized with NP-CGG (chicken gamma globulin) into the right foot pad<sup>22</sup>. Mice were  
 206 imaged at day 8 p.i. when GCs had been fully established. Activated TN-XXL<sup>+</sup> YellowCaB

207 cells had migrated into the GC and, as confirmed by positive PNA- and anti-GFP  
208 immunofluorescence histology (Fig 3 a). At this time point, mice were surgically prepared for  
209 imaging as described before<sup>23</sup>. Briefly, the right popliteal lymph node was exposed,  
210 moisturized and flattened under a cover slip sealed against liquid drainage by an insulating  
211 compound. The temperature of the lymph node was adjusted to 37°C and monitored during  
212 the measurement. Our experiments revealed that the movement of single YellowCaB cells  
213 can be tracked *in vivo*. Calcium fluctuations can be made visible by intensity changes in an  
214 extra channel that depicts the FRET signal, as calculated from relative quenching of TN-XXL.  
215 Color-coding of intensity changes in the FRET channel showed time-dependent fluctuations  
216 of the signal and, in some particular cases, a sustained increase after prolonged contacts  
217 between two YellowCaB cells (Fig 3 b, movie S1). Interestingly, FRET intensity seemed to be  
218 mostly fluctuating around low levels in moving cells, whereas sustained increase required  
219 cell arrest (Fig S3). We already showed that signal changes in FRET of TN-XXL are  
220 reflecting BCR activation. The observed calcium fluctuations might therefore coincide with  
221 cell-to-cell contacts between FDCs and B cells, resulting in AG-dependent BCR stimulation.  
222 To test for this, we first measured the colocalization between signals within the FDC-channel  
223 and the citrine channel. The intensity of colocalization  $I_{\text{coloc}}$  of all cells was plotted as a  
224 function of frequency and biexponentially fitted (Fig 3 c). We set the threshold for a strong  
225 and sustained colocalization of FDCs and B cells to an intensity of 150AU within the  
226 colocalization channel. At this value, the decay of the biexponential fit was below 10%. We  
227 thus decided to term all cells with a colocalization intensity = 0 (naturally the most abundant  
228 ones) not colocalized, cells with a colocalization intensity between 1 and 150 transiently  
229 colocalized to FDCs (“scanning” or shortly touching the FDCs) and all cells above this  
230 intensity threshold strongly or stably colocalized. When we compared the relative FRET  
231 intensity changes  $\Delta R/R$  of a tracked cell (Fig 3 b, cell 1), where baseline R is the lowest  
232 FRET intensity measured, and its contacts to FDCs, we could indeed detect several transient  
233 B-cell-FDC contacts that were followed by a step-wise increase of  $\Delta R/R$  and thus an  
234 increase of cytoplasmic calcium concentration (Fig 3 d). These increases in B cells were not  
235 only restricted to contacts with FDCs, but also occurred between B cells: A visible contact of  
236 cell 1 (Fig 3 b, cell 1) to a fellow B cell (Fig 3 b, cell 2) caused a sustained boost of the  
237 calcium concentration in the tracked cell 1 (Fig 3d). Cell 2 itself kept strong FDC contact over  
238 the whole imaging period and maintained elevated, but mostly stable  $\Delta R/R$  values. These  
239 experiments confirmed that GC B cells are able to collect calcium as a consequence of  
240 repeated signaling events mediated by FDC-to-B cell contacts and, surprisingly, also by B-to-  
241 B cell contacts *in vivo*.

242 Next, we asked if the ability to perform BCR signaling is dependent on BCR affinity. Thus, we  
243 adoptively transferred stained polyclonal, non-AG-specific YellowCaB cells one day prior to



244 intravital imaging and compared FRET-signal changes of several tracked cells over time  
245 within the same measurement. Non-AG-specific YellowCaB cells showed a rather  
246 homogenous distribution of calcium concentration with low intensity fluctuations in the FRET  
247 channel around a mean of 13.88AU, whereas AG-specific YellowCaB cells showed  
248 heterogeneous signaling patterns with higher FRET intensities of 14.25AU on average (Fig.  
249 3e). We compared ratiometric FRET histograms of non-AG-specific and AG-specific cells out  
250 of five different measurements. To do so, we normalized FRET values by the mean  
251 fluorescence intensity averaged over all non-AG-specific YellowCaB cells. This further  
252 confirmed a positive correlation of B cell calcium concentration and BCR-affinity (Fig S4).

### 253 **Absolute quantification of cytoplasmic calcium by eCFP fluorescence lifetime analysis** 254 **reveals activation-dependent calcium heterogeneity in B cells**

255 Due to varying imaging depths and therefore differing noise levels in tissue, the comparison  
256 of measurements in a ratiometric set-up only gives relative information about calcium  
257 concentrations. Therefore, universal statements on calcium levels among different B cell  
258 populations will demand absolute quantification. We switched our imaging set-up from the  
259 analysis of the fluorescent intensities of eCFP and citrine to the measurement of the  
260 fluorescence lifetime ( $\tau$ ) of the FRET-donor eCFP. Fluorescence lifetime is defined as the  
261 mean time a fluorescent molecule stays in an elevated energetic state after excitation, before  
262 photon emission and relaxation to the ground state take place. As a fully calcium-quenched  
263 eCFP in the GECI TN-XXL would transfer its energy mainly to citrine, its fluorescence lifetime  
264 would be measurably shorter than on an unquenched eCFP. Phasor analysis of time-domain  
265 FLIM virtually transfers time-resolved fluorescence data into phase domain data by discrete  
266 Fourier transformation<sup>14</sup>. This approach overcomes the obstacles of multi-component  
267 exponential analysis and yields readily comparable pixel- or cell based plots that assign a  
268 position within a half-circle to each data point, dependent on the mixture of lifetime  
269 components present<sup>24</sup>.

270

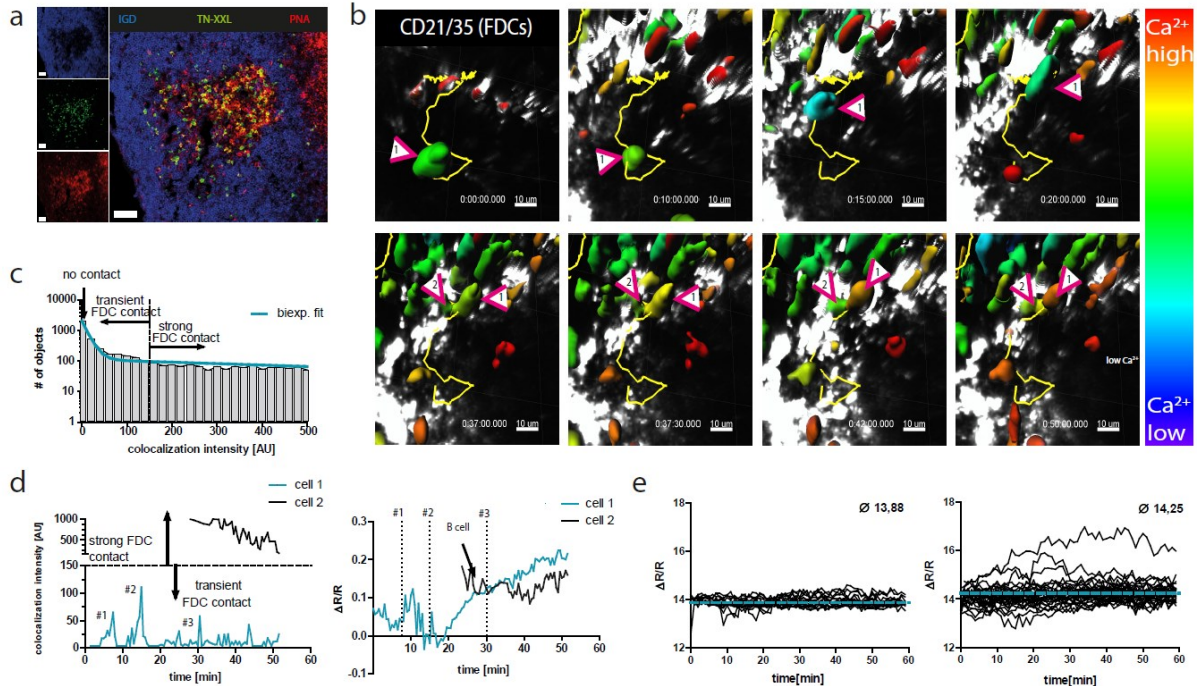

271

272 Fig. 3 YellowCaB cells form productive germinal centers in vivo and show active BCR signaling after cell-to-cell contacts. a  
 273 Histological analysis of lymph nodes after adoptive transfer of polyclonal YellowCaB cells to restricted hosts. TN-XXL (green)  
 274 positive cells cluster in IgD (blue) negative regions and are showing activation, confirmed by PNA staining (red). Scale bar  
 275 50 $\mu$ m. b Stills of intravital imaging of polyclonal YellowCaB cells transferred to restricted host. 3D surface rendering and  
 276 single-cell tracking (track line in yellow) with relative color coding ranging from blue= low  $\Delta R/R$  to red=high  $\Delta R/R$  c  
 277 Histogram showing cell frequency vs. colocalization intensity [AU] and biexponential fit of data. A curve decay of <10% was  
 278 set as threshold parting transient from strong B cell-to-FDC contact. All cells with colocalization intensity <1 were assigned  
 279 negative. d Colocalization intensities of tracked cells 1 and 2 over time vs FRET signal change of cell 1 and 2 over time.  
 280 Contact events to FDCs are assigned numbers #1, #2 and #3. Contact between cell 1 and 2 is indicated by arrow. e  
 281 Comparison of FRET signal change of naive and AG-specific YellowCaB cells over time.; blue line indicates mean value of all  
 282 tracked cells n=16 (naive) and n=33 (AG-spec.).

283 Employing our adoptive cell transfer set up described above (Fig 4 a), we could divide GC B  
 284 cells into five different populations based on their location in the imaging volume and their  
 285 fluorescent appearance. At day 8 p.i., polyclonal YellowCaB cells, identified by their red  
 286 labeling, mostly lined up at the follicular mantle around the GC, with some of them having  
 287 already entered into activated B cell follicles. AG-specific, citrine-positive B1-8hi:YellowCaB  
 288 cells were found clustered in the GC, close to FDCs, outside of GC boundaries, or as bigger,  
 289 egg-shaped differentiated cells in the extrafollicular medullary cords (MC), probably  
 290 comprising plasma blasts (Fig. 4 b). Color-coded 2D and 3D FLIM analysis of these  
 291 populations confirmed that calcium concentrations were fluctuating within all of those B cell  
 292 populations, and that most B cells were maintaining relatively high fluorescence lifetimes and  
 293 therefore low calcium concentration on average with single-cell exceptions (Fig. 4 b, movie  
 294 S2). It should be noted that autofluorescence of the capsule or macrophages contributed to  
 295 tau values <800ps, indicated by dark red color-coding and is not to be attributed to high  
 296 calcium values. Phasor analysis and plotting of the B cell-wise segmented lifetime data  
 297 further confirmed the presence of cell clones with quenched TN-XXL, somewhat surprisingly

298 also among plasma blasts, which are thought to down-regulate their surface BCR (Fig 4c,  
299 movie S3). To translate the measured lifetime values into absolute calcium concentrations,  
300 we projected the data points onto the phasor connecting quenched and unquenched eCFP  
301 (Fig. 4d). In this way, we corrected for artifacts acting on the phasor vectors and, implicitly,  
302 on the fluorescence lifetimes caused by contribution of background noise (Fig S5).  
303 Comparison of AG-specific cells inside GCs with those outside GCs, and non-AG-specific  
304 cells inside GCs as well with those outside GCs showed that the distribution of calcium  
305 concentrations of these B cells were dependent on BCR specificity and rather independent  
306 from their location within the imaging volume, despite higher fluctuation seen among AG-  
307 specific populations (Fig S5). However, we noted the emergence of a cell subset that is high  
308 in calcium and therefore located on the right half of the plot, in AG-specific cells and most  
309 prominent among cells within the MC, as compared to non-AG-specific YellowCaB cells.  
310 Overlay of an imaging snapshot shows that only few cells are in a state of elevated calcium  
311 (>800nM) at one given time point (Fig. 4e). Accordingly, these maxima were reached as  
312 transient fluctuation peaks, i.e. periods of below one minute, in which these concentrations  
313 seem to be tolerated. Calcium values exceeding the dynamic range of TN-XXL (>857nM)  
314 were recorded for all measured subsets, but the most cells >857nM were found among  
315 intrafollicular AG-specific B cells and extrafollicular AG-specific B cells. (Fig. 4f). The  
316 heterogeneity in temporal calcium concentrations therefore is smallest among non-AG  
317 specific B cells, increases with activation in AG-specific GC B cells, and is most prominent  
318 among plasma blasts. Thus, a progressive heterogeneity of calcium signals within B cells  
319 can be seen alongside the process of activation and differentiation.

## 320 **Functional relevance of increased calcium concentration among extrafollicular** 321 **YellowCaB cells**

322 The surprising finding of elevated cytoplasmic calcium levels in extrafollicular B cells led us to  
323 analyze this subset further. Recently, contacts with subcapsular sinus macrophages (SCSM)  
324 were reported to induce the differentiation of memory B cells to antibody producing plasma  
325 cells<sup>25-27</sup>. To test, if SCSM could be the cause of elevated extrafollicular calcium levels in  
326 differentiated, extrafollicular B cells, we . intravitaly imaged wild type host mice that have  
327 been adoptively transferred with B1-8hi:YellowCaB cells and received an injection of  
328 efluor660-labeled anti-CD169 antibody together with the usual FDCs labeling one day prior  
329 to analysis. We concentrated on the area beneath the capsule, identified by second  
330 harmonic generation signals of collagen fibers in this area. Thresholds of colocalization  
331 between CD169<sup>+</sup> macrophages and TN-XXL<sup>+</sup> YellowCaB cells are described in Fig S6.  
332 Together, these methods led to the 3D visualization of the SCS with CD169 stained  
333 macrophages, lined up in close proximity. (Fig5a). AG-specific YellowCaB cells were

334 detected clustering in GCs nearby. Extrafollicular YellowCaB cells crowding the SCS space  
335 were found to have multiple contact sites to SCSM. Some B cells were observed to migrate  
336 along the SCS, possibly scanning for stimulatory signals like antigen (movie S4). Cell  
337 tracking and simultaneous analysis of absolute calcium concentration and colocalization  
338 intensity revealed that B-cell-to-SCSM contacts resulted in an immediate increase in  
339 cytoplasmic calcium concentration. In line with this, the loss of a transient-made contact  
340 directly leads to a decrease in calcium concentration (Fig 5b). This was further confirmed by  
341 bulk analysis of all detected YellowCaB cells over the whole imaging period (Fig 5c). Relating  
342 calcium concentration and colocalization showed that the calcium concentration in  
343 YellowCaB cells with direct contact to SCSM reaches values that are more than doubled  
344 compared to that in cells that were not in contact Furthermore, calcium concentration  
345 increase seems to be positively correlated to B cell-to-SCSM contact strength. Co-  
346 localization intensities between 0 and 1 were defined as no-contact. All values above  
347 describe transient or strong contact. The threshold between transient and strong contact has  
348 been set to 10% decay of the biexponentially fitted histogram over all cells. Cells that were  
349 defined as strong contacters also reached the highest calcium concentrations. We conclude  
350 that contacts of B cells to SCSM could induce elevation of B cell cytoplasmic calcium  
351 concentrations, presumably due to activation, with the absolute concentrations being  
352 dependent on the strength of the contact.

353



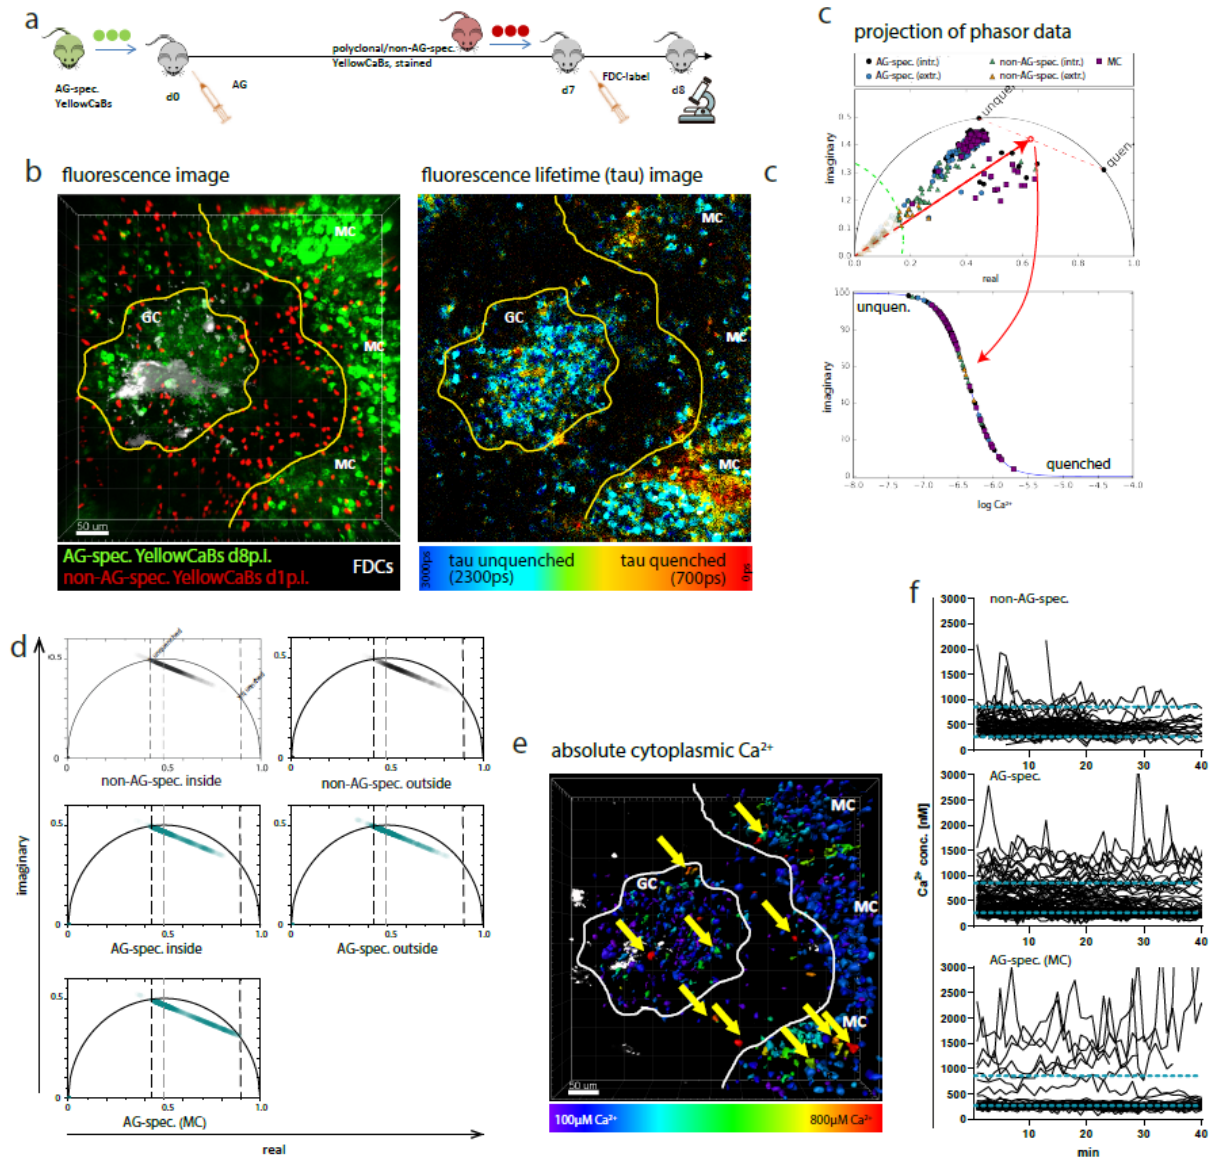

354

355 Fig. 4 Determination of absolute calcium concentration by intravital fluorescence lifetime imaging of GC B cell populations.  
 356 a Cell transfer and immunization strategy for intravital imaging of AG-specific and polyclonal YellowCaB B cells. b z-stack of  
 357 intravitaly imaged germinal center (GC) and medullary cords (MC). B cells have been distinguished into polyclonal, non-AG-  
 358 specific YellowCaB cells (red) inside and outside the germinal center, AG-specific YellowCaB cells inside and outside the  
 359 germinal center and differentiated B cells (plasma blasts) due to staining and localization (left). Color-coded fluorescence  
 360 lifetime image (right) with lifetimes of unquenched eCFP depicted in blue and lifetimes of quenched eCFP in red. c Phasor  
 361 plot of fluorescence lifetimes measured in b with indicated subpopulations. Green radius indicates noise that has been  
 362 excluded from the evaluation of absolute calcium concentrations. For absolute calcium concentration determination,  
 363 phasors of single cells have been projected to the red-dashed line connecting fully calcium-saturated (quenched) and  
 364 calcium-free (unquenched) conditions d Projections of phasor vectors onto connecting line between unquenched and  
 365 quenched eCFP lifetimes among the different subpopulations. f calcium concentrations intravitaly measured with FLIM-  
 366 phasor in germinal center B cell populations over time. Non-AG-specific YellowCaB cells (left, n=92) compared to AG-  
 367 specific YellowCaB cells (middle, n=169) and extrafollicular, AG-specific YellowCaB cells (right, n=69) The dynamic range of  
 368 the GECl TN-XXL is indicated by blue dashed lines.

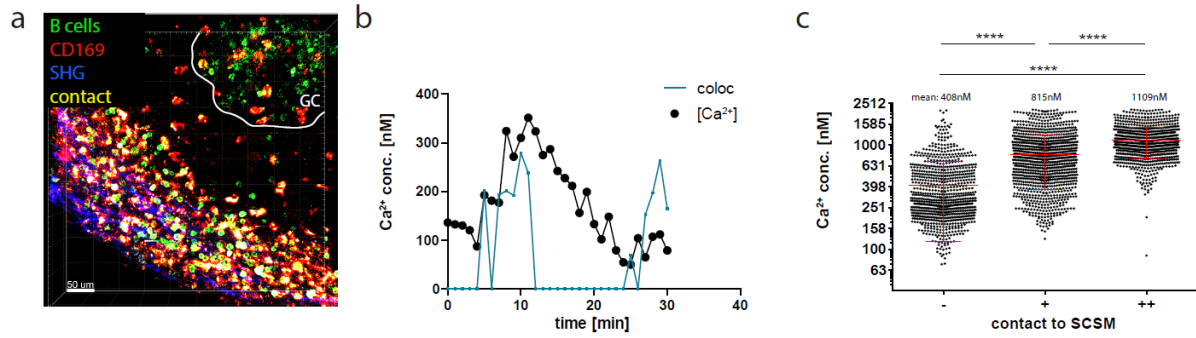

369

370 Fig. 5 Differentiated B cells show elevated calcium concentrations after contact to macrophages of the subcapsular sinus. a  
371 z-stack of intravitaly imaged lymph node with germinal center (GC) and subcapsular sinus (SHG, blue). CD169<sup>+</sup>  
372 macrophages (red) lining the subcapsular sinus show large contacts (yellow) to YellowCaB cells (green) of increased  
373 brightness and size that therefore have been identified as differentiated B cells. Size 500x500x78μm. Scale bar 60μm. b  
374 Single-cell track of a YellowCaB cell making transient contact to macrophage, blue: colocalization intensity [AU], black:  
375 change of absolute calcium concentration. c FLIM measurement of mean absolute calcium concentration of YellowCaB cells  
376 showing no (-), transient (+) or strong (++) overlap with CD169<sup>+</sup> signal. n=1000, ANOVA analysis (\*\*\*\*: p<0.0001), mean and  
377 SD.

## 378 Discussion

379 Intravital imaging technologies have helped to elucidate the nature of the GC reaction a great  
380 deal. AG-capture, cycling between zones, and development of clonality patterns have been  
381 made visible by two-photon microscopic techniques<sup>5,28–30</sup>. Furthermore, important functional  
382 *in vivo* data like signaling in T helper cells have been collected using a calcium sensitive  
383 protein<sup>31,32</sup>. However, research on signaling of (GC) B cells *in vivo* so far involved transfer  
384 and immunization experiments and *ex vivo* analysis of sorted cells, or used non-reversible  
385 BCR-signaling reporters like Nur77, leaving aside the notion that B cell activation and  
386 selection is a highly dynamic process<sup>10,33,34</sup>. These experiments concluded that only a small  
387 amount of GC B cells seem to maintain the signaling capacity of naive, mature B cells and  
388 that BCR signaling thus is dispensable in GCs<sup>10,11,35–38</sup>. On the other hand, BCR-regulating  
389 surface proteins like CD22 or Sialic acid-binding immunoglobulin-type lectins (Siglecs) have  
390 been related to development of autoimmunity and point out to BCR signaling as an important  
391 component, not only in B cell development but also in differentiation to effector cells<sup>39–42</sup>.

392 For flexible analysis of signaling in cells of the CD19<sup>+</sup> lineage, we developed of a novel  
393 transgenic reporter system and image processing approach, enabling quantification of the  
394 signaling second messenger calcium. For the first time, we could measure absolute B cell  
395 cytoplasmic calcium concentrations *in vivo*. The FRET-based GECI TN-XXL can be used  
396 stably in moving, proliferating and differentiating lymphocytes and the reversibility of the  
397 sensor makes it suitable for longitudinal intravital measurements.

398 At first, by measuring calcium flux within B cells *in vitro*, we could show fast reversibility and  
399 suitable sensitivity of the GECI TN-XXL for intravital applications. Using a flow chamber  
400 system, we could show that repeated BCR activation leads to repeated calcium elevation in



401 the cytoplasm. Thus, our system shows that B cells are able to collect and integrate  
402 sequential signals, probably for positive selection, acting via calcium accumulation up to a  
403 hypothetic threshold. In support of that, B cellular calcium concentration must not  
404 constitutively exceed a certain value in order to prevent mitochondrial depolarization<sup>43,44</sup> On  
405 the other hand, it is known that certain elevated calcium concentrations and timely regulated  
406 calcium flux patterns decide if and which downstream transcription factors are activated<sup>45,46</sup>.  
407 Balancing out calcium concentrations might thus also function in sensing the completion of  
408 affinity maturation. We propose calcium fluctuation as time- and strength-coded system for  
409 the transduction of information about growing BCR affinity. Other fine-tuned signaling  
410 mechanisms are well known to instruct transcriptional mechanisms, though partly conflicting;  
411 e.g. CD40 signaling is absolutely indispensable for entry of B cells into the GC reaction, but  
412 prolonged CD40 signaling instead promotes IRF4 transcription and therefore favors an  
413 extrafollicular ASC phenotype<sup>47</sup>.

414 Next, to investigate B cell signaling using an intravital set-up, we needed to establish an  
415 intensity- and scattering-independent approach. Using phasor-based FLIM, we were able to  
416 master the hindering effects of wavelength-dependent aberrations in the tissue that influence  
417 the performance of each fluorophore individually. In order to extract absolute cytoplasmic  
418 calcium concentrations from the donor lifetime data *in vivo*, we developed a numerical  
419 strategy based on the exclusion of low SNR pixel values and on the correlation of amplitude  
420 and phase of the phase vectors to account for experimental uncertainty.

421 Employing this methodology, we can describe the connection between signaling and  
422 selection in a novel way. We could visualize that during differentiation, B cells undergo  
423 repeated stimulation via BCR- and costimulatory signals that stem from serial contacts of B  
424 cells with FDCs or other B cells, the latter possibly being explained by simultaneous  
425 stimulation of BCRs and Fc receptors<sup>48-52</sup>. Using time-resolved FRET-FLIM measurements in  
426 GC, we could show that BCR AG-specificity and state of differentiation are closely related to  
427 distinct degrees of heterogeneity of calcium concentrations. Furthermore, we found that  
428 differentiated extrafollicular B cells or plasma blasts are among the cells with highest calcium  
429 concentrations within our set up. It is known that high calcium concentrations might also act  
430 as stress signal that demands restriction. Recent reports state that elevated calcium might  
431 set a “metabolic timer” for T cell help to rescue a mitochondria-depolarizing ion  
432 concentration<sup>53</sup>. This shows that calcium levels within cells need to be tightly regulated, as it  
433 does also play its part in the induction of apoptosis. Calcium levels of >1  $\mu\text{M}$  over the duration  
434 of >1 h have been reported damaging in neurons<sup>54,55</sup>. Since apoptosis is the default fate for B  
435 cells in the germinal center reaction<sup>56</sup>, CD40 and TLR signaling might contribute to the  
436 limiting of cytoplasmic calcium concentrations and thus promote cell survival of B cell clones

437 with appropriate BCR affinity<sup>21,57–60</sup>. For CD40 signaling in immature B cells this has been  
438 confirmed<sup>61</sup>. Our data does show that TLR signaling can attenuate calcium flux in stimulated  
439 B cells, CD40 can either attenuate or augment the calcium response, presumably depending  
440 on the affinity of the BCR and its efficiency in presenting AG<sup>29,32</sup>.

441 We are confident that our set-up models different B cell activation and differentiation stages  
442 in a single measurement, though it is worthwhile noting that the cells imaged within the MC  
443 region most likely comprise of extrafollicularly generated plasma blasts, rather than  
444 differentiated B cells that have left the GC (these are reported to appear only at much later  
445 stages of the response)<sup>62</sup>. We suggest that during differentiation, calcium signals mainly act  
446 as transcriptional regulators, whereas it is likely that this is different in terminally  
447 differentiated cells. Indeed we were able to image ongoing cytoplasmic calcium elevation in  
448 the regions of the MC or the subcapsular sinus and confirmed that B cells in contact to  
449 SCSM had significantly higher cytosolic calcium concentrations. The SCS has recently been  
450 proposed as site of reactivation of memory B cells<sup>25</sup>.

451 Importantly, changes in mitochondrial membrane potential and/or the integrity of the ER also  
452 lead to varying calcium concentrations within cells, since both act as major intracellular  
453 calcium buffering organelles<sup>63</sup>. A close connection between mitochondrial calcium  
454 homeostasis, altered ROS production and the expression of plasma cell master transcription  
455 factor BLIMP1, as well as changes in metabolism have been reported previously<sup>64,65</sup>. We  
456 have already applied phasor-FLIM of endogenous NAD(P)H fluorescence for mapping of  
457 enzyme activities in cell cultures<sup>62</sup>. The application of this method and combination with  
458 calcium imaging holds great potential to further dissect immunometabolic processes in B  
459 cells, short- and long-lived plasma cells *in vivo*.

## 460 **Methods**

### 461 Mice

462 PR26CAGTN-XXL<sup>flox/flox</sup> mice were obtained by courtesy of F. Kirchhoff, Saarland University,  
463 Homburg<sup>66</sup>. YellowCaB mice were generated by crossing of R26CAGTN-XXL<sup>flox/flox</sup> mice with  
464 the CD19<sup>cre/cre</sup> strain<sup>16</sup> and maintained on a C57/Bl6 background. Only YellowCaB mice  
465 heterozygous for cre were used to avoid deletion of CD19. Mice with monoclonal NP-specific  
466 BCR (B1-8<sup>hi</sup>:YellowCaB) were generated by crossing of YellowCaB mice with B1-8<sup>hi</sup> mice<sup>22</sup>.  
467 Thx mice were used as irrelevant-BCR hosts. All mice were bred in the animal facility of the  
468 DRFZ. All animal experiments were approved by Landesamt für Gesundheit und Soziales,  
469 Berlin, Germany, in accordance with institutional, state, and federal guidelines.

### 470 Cells

471 Primary splenocytes were isolated from whole spleens of YellowCaB mice or  
472 B1-8<sup>hi</sup>:YellowCaB mice in 1xPBS and erythrocytes lysed. B cells were negatively isolated  
473 using the Miltenyi murine B cell isolation kit via magnetic assisted cell sorting (MACS) leave  
474 B cells untouched in order not to pre-stimulate them.

#### 475 Staining and flow cytometry

476 Single cell suspensions were prepared and stained according to the guidelines for flow  
477 cytometry and cell sorting in immunological studies<sup>67</sup>. To simultaneously assess calcium  
478 influx with a dye-based method we stained whole splenocytes or isolated B cells with the  
479 calcium sensitive dye X-Rhod-1 (invitrogen). X-Rhod-1 is a single-fluorophore calcium  
480 reporter molecule that enhances its fluorescence intensity upon calcium binding in a range of  
481 0-40  $\mu\text{M}$  up to 100 times at a wavelength of 600nm. Measurements were carried out at a BD  
482 Fortessa flow cytometer. TN-XXL expression was checked assessing positive fluorescence  
483 in a  $525\pm 25$  nm channel after 488nm excitation on a MACSQuant flow cytometer.

#### 484 Perfusion chamber

485 All *in vitro* experiments were carried out in Krebs-Ringer solution containing 6mM  $\text{Ca}^{2+}$  at  
486 37°C. Cells were stimulated with anti-mouse IgM-F(ab)<sub>2</sub> (Southern Biotech), ionomycin (4 $\mu\text{M}$ ,  
487 Sigma), anti-CD40 antibody (xy), LPS (20  $\mu\text{g}/\text{ml}$ , Sigma) or CpG (10  $\mu\text{g}/\text{ml}$ , TIB Molbiol  
488 Berlin). Cell culture imaging experiments with ionomycin stimulation were performed using an  
489 open perfusion chamber system. Buffer solution was pumped through the heated chamber  
490 containing a poly-D-Lysin coated glass slide on which freshly and sterile isolated YellowCaB  
491 cells were grown for approx. 1 h. Ionomycin was added in the flow-through buffer supply. The  
492 lag time for the volume to arrive at the imaging volume was determined for each set-up and  
493 considered for analysis of  $\Delta R/R$  over time. Anti-IgM-F(ab)<sub>2</sub> antibody was given directly to  
494 cells within the open chamber in between acquisition time points. To visualize the reversibility  
495 of the sensor despite antibody still present, the experiment was performed in an open culture  
496 system without media exchange through a pump. To analyze if YellowCaB cells could  
497 repeatedly be stimulated, experiments were performed under continuous perfusion. Buffer  
498 flow was switched off with stimulation for several minutes and switched on again to dilute  
499 antibody out again for a second stimulation.

500 For analysis, regions of interest were determined based on randomly chosen single cells.  
501 Intensity density values of the raw citrine signal were divided by the intensity density values  
502 of the raw eCFP signal and related to the baseline ratio of the signals before stimulation.

#### 503 Cell transfers, immunization and surgical procedures

504 B cells from spleens of YellowCaB mice were negatively isolated using the Miltenyi murine B  
505 cell isolation kit via MACS.  $5 \times 10^6$  cells were transferred to a host mouse with a transgenic B  
506 cell receptor specific for an irrelevant antigen (myelin oligodendrocyte glycoprotein). B cells  
507 from spleens of B1-8<sup>hi</sup>:YellowCaB mice were transferred to WT C57/Bl6 mice. Host mice  
508 were immunized in the right footpad with 10  $\mu$ g NP-CGG in complete Freund's adjuvant 24h  
509 after B cell transfer. After six to eight days p.i., FDCs were labeled with Fab-Fragment of  
510 CD21/35-Atto590 or CD21/35-Alexa647 (inhouse coupling) into the right footpad. 24h after  
511 labelling, the popliteal lymph node was exposed for two-photon-imaging as described  
512 before<sup>23</sup>. Briefly, the anesthetized mouse is fixed on a microscope stage custom-made for  
513 imaging the popliteal lymph node. The mouse is shaved and incisions are made to introduce  
514 fixators that surround the spine and the femoral bone. The mouse is thus held in a planar  
515 position to the object table. The right foot is fixed by wire allowing to increase the tension on  
516 the leg to position the lymph node parallel to the imaging set up. A small incision is made to  
517 the popliteal area. The lymph node is exposed after freeing it from surrounding adipose  
518 tissue. A puddle around the lymph node is formed out of insulating silicon compound, then  
519 filled with NaCl and covered bubble-free with a cover slide.

#### 520 Intravital and live cell imaging and image analysis

521 Imaging experiments of freshly isolated B cells were carried out using a Zeiss LSM 710  
522 confocal microscope. Images were acquired measuring 200-600 frames with 1 frame/3s  
523 frame rate while simultaneously detecting eCFP and citrine signals at an excitation  
524 wavelength of 405 nm.

525 For intravital two-photon ratiometric imaging, Z-stacks were acquired over a time period of  
526 30-50 min with image acquisition every 30 seconds. eCFP and citrine were excited at 850nm  
527 by a fs-pulsed Ti:Sa laser and fluorescence was detected at  $466 \pm 30$  nm or  $525 \pm 25$  nm,  
528 respectively. Fluorescence signals of FDCs were detected in a  $593 \pm 20$  nm channel. For  
529 experiments including macrophage-staining, the fluorescence data has been unmixed for a  
530 possible overlap of the TN-XXL-citrine signal with that of the injected marker to prevent false-  
531 positive colocalization analysis between the red eFluor660 coupling of anti-CD169 and the  
532 green fluorescence of TN-XXL in the  $525 \pm 25$  nm channel<sup>68</sup>.

533 For intravital FLIM experiments, eCFP fluorescence lifetime was measured with a time-  
534 correlated single-photon counting system (LaVision Biotec, Bielefeld, Germany). The  
535 fluorescence decay curve encompassed 10 ns with a time resolution of 55 ps and is a bi-  
536 exponential function containing the two mono-exponential decays of unquenched CFP and of  
537 FRET-quenched CFP, respectively.

#### 538 Analysis of two-photon data

539 For ratiometric analysis of two-photon data (here the exciting wavelength of 850 nm is also  
540 stimulating citrine fluorescence directly), fluorescence signals were corrected for spectral  
541 overlap (the eCFP to citrine ratio in 525±25 nm channel is 0.52/0.48) and refined by taking  
542 into account the sensitivity of photomultiplier tubes (PMTs, 0.37 for 466±30 nm and 0.4 for  
543 525±25 nm). Ratiometric FRET for in vivo experiments was accordingly calculated as

544 
$$FRET = \frac{1,2 \cdot ch2}{2,7 \cdot ch1 + 2,5 \cdot ch2} \cdot 100 \quad (\text{Eq. 1})$$

545 Evaluation of FLIM data was performed using the phasor approach<sup>14,24</sup>. Briefly, the  
546 fluorescence decay in each pixel of the image is Fourier-transformed at a frequency of  
547 80 MHz and normalized, resulting into a phasor vector, with the origin at (0|0) in a cartesian  
548 system, pointing into a distinct direction within a half-circle centered at (0.5|0) and a radius of  
549 0.5. For pure substances, lifetime vectors end directly on the half-circle, for mixtures of two  
550 on a connecting line between the respective pure lifetimes and within a triangle, if three  
551 substances are present, and so on. The distance between several fluorescence lifetimes on  
552 the half-circle is naturally distributed logarithmically, with the longest lifetimes closer to the  
553 origin. In the case of TN XXL, the extremes are the unquenched CFP fluorescence (2300 ps)  
554 and the CFP fluorescence completely quenched by FRET (700 ps). The location of the  
555 measured lifetime on the connecting line can directly be translated into the amount of either  
556 CFP state and thus to a corresponding calcium concentration.

557 Due to the scattering environment in tissue, the FLIM-signal of the donor is shifted towards  
558 the (0/0) position in the phasor plot, indicative for the infinite lifetime of noise. Thus the phase  
559 vectors are shortened and end within a triangle between the points (0|0), approximately  
560 2300 ps and 700 ps. The noise should therefore be considered as a contribution of a third  
561 exponential component. In a non-fluorescent medium, we measured a noisy FLIM-signal  
562 under similar experimental conditions as those used in the intravital experiments and  
563 Gaussian-fitted the histograms of real and imaginary part after the transformation to the  
564 frequency domain. The Gaussian fit of each part gives a mean, which indicates the center of  
565 the noise distribution, as well as the width ( $FWHM = 2\sqrt{2\ln 2}\sigma$ ), which was the same for  
566 both parts (real and imaginary axis) and gives us the radius ( $\frac{1}{2}FWHM=0.2$  (green, solid arc  
567 in Fig. S5) within which we expect only noise, i.e. the signal-to-background-ratio is unreliable  
568 small. In order to increase the accuracy, we enlarged the radius to  $\frac{3}{4}FWHM=0.3$  (green,  
569 dashed arc in Fig. S5) and all data points within that radius were excluded from further  
570 analysis. A second filtering was applied by determining the signal-to-noise ratio (SNR) from  
571 the summed TCSPC signal for all segmented cells. In Imaris, a sphere of radius=20µm was  
572 determined around each cell to establish a reference value for background noise. The SNR  
573 was then calculated as follows (pixel by pixel):

574 
$$\frac{I_{sig}-I_{bg}}{STD_{bg}} \text{ (Eq. 3)}$$

575 With  $I_{sig}$  being the intensity of TCSPC signal,  $I_{bg}$  the intensity of background noise and  $STD_{bg}$   
576 the background noise standard deviation<sup>69</sup> AG specific signals with  $SNR < 2$  and non-AG  
577 specific signals with  $SNR < 1$  were excluded from the analysis. All other phasor data points  
578 were projected on the segment connecting FRET-quenched and unquenched CFP  
579 fluorescence lifetime, in order to determine absolute calcium concentrations as follows:

580 
$$\log[Ca^{2+}] = \log K_d + 0.2 \cdot \ln \left[ \frac{2300-700}{\tau-700} - 1 \right] \text{ (Eq. 2)}$$

581

582 with  $K_d = 453 \text{ nM calcium}^{15}$ . The linear range of the TN-XXL titration curve was determined to  
583 be 265nM-857nM. All values below or above these margins are subject to uncertainty and  
584 therefore simply referred to as  $< 265 \text{ nM}$  or  $> 875 \text{ nM}$ , respectively.

### 585 **Statistical information**

586 Time dependent FRET curve analysis shows representative graphs for the number of  
587 analyzed cells and independent experiments given. For multiple curve analysis, mean is  
588 shown and SD indicated in each data point. For column analysis, One-way ANOVA with  
589 Bonferroni Multiple Comparison Test was applied with a confidence Interval of 95%.

### 590 **Data availability**

591 All raw data and analyzed data shown here are stored on institutional servers and may be  
592 accessed upon request to the corresponding author.

### 593 **Code availability**

594 Python-based code for phasor analysis can be provided upon request.

### 595 **References**

- 596 1. Victora, G. D. & Nussenzweig, M. C. Germinal Centers. *Annu. Rev. Immunol.* **30**, 429–  
597 457 (2012).
- 598 2. Berek, C., Berger, a. & Apel, M. Maturation of the immune response in germinal  
599 centers. *Cell* **67**, 1121–1129 (1991).
- 600 3. De Silva, N. S. & Klein, U. Dynamics of B cells in germinal centres. *Nat. Rev.*  
601 *Immunol.* **15**, 137–148 (2015).
- 602 4. Tolar, P., Hanna, J., Krueger, P. D. & Pierce, S. K. The constant region of the



- 603 membrane immunoglobulin mediates B cell-receptor clustering and signaling in  
604 response to membrane antigens. *Immunity* **30**, 44–55 (2009).
- 605 5. Suzuki, K., Grigorova, I., Phan, T. G., Kelly, L. M. & Cyster, J. G. Visualizing B cell  
606 capture of cognate antigen from follicular dendritic cells. *J. Exp. Med.* **206**, 1485–1493  
607 (2009).
- 608 6. Su, T. T. *et al.* PKC- $\beta$  controls I $\kappa$ B kinase lipid raft recruitment and activation in  
609 response to BCR signaling. *Nat. Immunol.* (2002). doi:10.1038/ni823
- 610 7. Saijo, K. *et al.* Protein Kinase C  $\beta$  Controls Nuclear Factor  $\kappa$ B Activation in B Cells  
611 Through Selective Regulation of the I $\kappa$ B Kinase  $\alpha$ . *J. Exp. Med.* (2002).  
612 doi:10.1084/jem.20020408
- 613 8. Crabtree, G. R. & Olson, E. N. NFAT signaling: choreographing the social lives of  
614 cells. *Cell* (2002).
- 615 9. Jellusova, J. Cross-talk between signal transduction and metabolism in B cells.  
616 *Immunol. Lett.* **201**, 1–13 (2018).
- 617 10. Luo, W. *et al.* B cell receptor and CD40 signaling are rewired for synergistic induction  
618 of the c-Myc transcription factor in germinal center B cells. *Immunity* **48**, 313–326  
619 (2018).
- 620 11. Gitlin, A. D. *et al.* T cell help controls the speed of the cell cycle in germinal center B  
621 cells. *Science* (80-. ). **349**, 643–646 (2015).
- 622 12. Akkaya, M. *et al.* Second signals rescue B cells from activation-induced mitochondrial  
623 dysfunction and death. *Nat. Immunol.* **19**, 871–884 (2018).
- 624 13. Mank, M. *et al.* A FRET-based calcium biosensor with fast signal kinetics and high  
625 fluorescence change. *Biophys. J.* **90**, 1790–1796 (2006).
- 626 14. Digman, M. A., Caiolfa, V. R., Zamai, M. & Gratton, E. The phasor approach to  
627 fluorescence lifetime imaging analysis. *Biophys. J.* **94**, L14–L16 (2008).
- 628 15. Geiger, A. *et al.* Correlating calcium binding, Förster resonance energy transfer, and  
629 conformational change in the biosensor TN-XXL. *Biophys. J.* **102**, 2401–10 (2012).
- 630 16. Rickert, R. C., Roes, J. & Rajewsky, K. B lymphocyte-specific, Cre-mediated  
631 mutagenesis in mice. *Nucleic Acids Res.* **25**, 1317–1318 (1997).
- 632 17. Li, N., Sul, J.-Y. & Haydon, P. G. A calcium-induced calcium influx factor, nitric oxide,

- 633 modulates the refilling of calcium stores in astrocytes. *J. Neurosci.* (2003).
- 634 18. Baba, Y., Matsumoto, M. & Kurosaki, T. Calcium signaling in B cells: Regulation of  
635 cytosolic Ca<sup>2+</sup> increase and its sensor molecules, STIM1 and STIM2. *Mol. Immunol.*  
636 **2**, 2–6 (2013).
- 637 19. Ojaniemi, M. *et al.* Phosphatidylinositol 3-kinase is involved in Toll-like receptor 4-  
638 mediated cytokine expression in mouse macrophages. *Eur. J. Immunol.* **33**, 597–605  
639 (2003).
- 640 20. Ren, H. *et al.* Toll-like receptor-triggered calcium mobilization protects mice against  
641 bacterial infection through extracellular ATP release. *Infect. Immun.* **82**, 5076–5085  
642 (2014).
- 643 21. Pone, E. J. *et al.* B cell TLR1/2, TLR4, TLR7 and TLR9 interact in induction of class  
644 switch DNA recombination: Modulation by BCR and CD40, and relevance to T-  
645 independent antibody responses. *Autoimmunity* **48**, 1–12 (2015).
- 646 22. Shih, T.-A. Y., Meffre, E., Roederer, M. & Nussenzweig, M. C. Role of BCR affinity in T  
647 cell dependent antibody responses in vivo. *Nat. Immunol.* **3**, 570–5 (2002).
- 648 23. Ulbricht, C., Lindquist, R. L., Tech, L. M. & Hauser, A. E. Tracking plasma cell  
649 differentiation in living mice with two-photon-microscopy. *Methods Mol. Biol.* **1623**, 37–  
650 50 (2017).
- 651 24. Leben, R. *et al.* Phasor-based endogenous NAD(P)H fluorescence lifetime imaging  
652 unravels specific enzymatic activity of neutrophil granulocytes preceding NETosis. *Int.*  
653 *J. Mol. Sci.* **19**, (2018).
- 654 25. Moran, I. *et al.* Memory B cells are reactivated in subcapsular proliferative foci of  
655 lymph nodes. *Nat. Commun.* **9**, 1–14 (2018).
- 656 26. Junt, T. *et al.* Subcapsular sinus macrophages in lymph nodes clear lymph-borne  
657 viruses and present them to antiviral B cells. *Nature* **450**, 110–114 (2007).
- 658 27. Von Andrian, U. H. & Mempel, T. R. Homing and cellular traffic in lymph nodes. *Nat.*  
659 *Rev. Immunol.* **3**, 867–878 (2003).
- 660 28. Hauser, A. E. *et al.* Definition of germinal-center B cell migration in vivo reveals  
661 predominant intrazonal circulation patterns. *Immunity* **26**, 655–67 (2007).
- 662 29. Victora, G. D. *et al.* Germinal center dynamics revealed by multiphoton microscopy  
663 using a photoactivatable fluorescent reporter. *Cell* **143**, 592–605 (2010).

- 664 30. Tas, J. M. J. *et al.* Visualizing antibody affinity maturation in germinal centers. *Science*  
665 (80- ). **58**, 7250–7 (2016).
- 666 31. Kyratsous, N. I. *et al.* Visualizing context-dependent calcium signaling in  
667 encephalitogenic T cells in vivo by two-photon microscopy. *Proc. Natl. Acad. Sci.* **114**,  
668 E6381–E6389 (2017).
- 669 32. Shulman, Z. *et al.* Dynamic signaling by T follicular helper cells during germinal center  
670 B cell selection. *Science* **345**, 1058–62 (2014).
- 671 33. Khalil, A. M., Cambier, J. C. & Shlomchik, M. J. B cell receptor signal transduction in  
672 the GC is short-circuited by high phosphatase activity. *Science* **336**, 1178–81 (2012).
- 673 34. Mueller, J., Matloubian, M. & Zikherman, J. Cutting Edge: An in vivo reporter reveals  
674 active B cell receptor signaling in the germinal center. *J. Immunol.* **194**, 2993–7  
675 (2015).
- 676 35. Zikherman, J., Parameswaran, R. & Weiss, A. Endogenous antigen tunes the  
677 responsiveness of naive B cells but not T cells. *Nature* **489**, 160–164 (2012).
- 678 36. Turner, J. S., Marthi, M., Benet, Z. L. & Grigorova, I. Transiently antigen-primed B cells  
679 return to naive-like state in absence of T-cell help. *Nat. Commun.* **8**, 15072 (2017).
- 680 37. Mesin, L., Ersching, J. & Victora, G. D. Germinal Center B Cell Dynamics. *Immunity*  
681 **45**, 471–482 (2016).
- 682 38. Silver, J. *et al.* Stochasticity enables BCR-independent germinal center initiation and  
683 antibody affinity maturation. *J. Exp. Med.* **215**, 77–90 (2018).
- 684 39. O’Keefe, T. L., Williams, G. T., Batista, F. D. & Neuberger, M. S. Deficiency in CD22, a  
685 B cell-specific inhibitory receptor, is sufficient to predispose to development of high  
686 affinity autoantibodies. *J. Exp. Med.* **189**, 1307–1313 (1999).
- 687 40. Nitschke, L. CD22 and Siglec-G regulate inhibition of B-cell signaling by sialic acid  
688 ligand binding and control B-cell tolerance. *Glycobiology* **24**, 807–817 (2014).
- 689 41. Jellusova, J. *et al.* CD22 × Siglec-G Double-Deficient Mice Have Massively Increased  
690 B1 Cell Numbers and Develop Systemic Autoimmunity. (2010).  
691 doi:10.4049/jimmunol.0902711
- 692 42. Hoffmann, A. *et al.* Siglec-G is a B1 cell-inhibitory receptor that controls expansion and  
693 calcium signaling of the B1 cell population. *Nat. Immunol.* **8**, 695–704 (2007).

- 694 43. Bouchon, A., Krammer, P. H. & Walczak, H. Critical role for mitochondria in B cell  
695 receptor-mediated apoptosis. *Eur. J. Immunol.* (2000). doi:10.1002/1521-  
696 4141(200001)30:1<69::AID-IMMU69>3.0.CO;2-#
- 697 44. Niiro, H. & Clark, E. A. Regulation of B-cell fate by antigen-receptor signals. *Nat. Rev.*  
698 *Immunol.* **2**, 945–56 (2002).
- 699 45. Dolmetsch, R. E., Lewis, R. S., Goodnow, C. C. & Healy, J. I. Differential activation of  
700 transcription factors induced by Ca<sup>2+</sup> response amplitude and duration. *Nature* **386**,  
701 855–858 (1997).
- 702 46. Healy, J. I. *et al.* Activated by the B cell receptor during positive versus negative  
703 signaling. *Immunity* **6**, 419–428 (1997).
- 704 47. Haberman, A. M., Gonzalez, D. G., Wong, P., Zhang, T. & Kerfoot, S. M. Germinal  
705 center B cell initiation, GC maturation, and the coevolution of its stromal cell niches.  
706 *Immunol. Rev.* **288**, 10–27 (2019).
- 707 48. Sörman, A., Zhang, L., Ding, Z. & Heyman, B. How antibodies use complement to  
708 regulate antibody responses. *Mol. Immunol.* **61**, 79–88 (2014).
- 709 49. Garside, P. Visualization of specific B and T lymphocyte interactions in the lymph  
710 node. *Science (80-. )*. **281**, 96–99 (1998).
- 711 50. Allen, C. D. C., Okada, T. & Cyster, J. G. Germinal Center Organization and Cellular  
712 Dynamics. **27**, 190–202 (2008).
- 713 51. Liu, D. *et al.* T-B-cell entanglement and ICOSL-driven feed-forward regulation of  
714 germinal centre reaction. *Nature* **517**, 214–218 (2015).
- 715 52. Phan, T. G., Green, J. A., Gray, E., Xu, Y. & Cyster, J. G. Immune complex relay by  
716 subcapsular sinus macrophages and noncognate B cells drives antibody affinity  
717 maturation. *Nat. Immunol.* **10**, 786–796 (2009).
- 718 53. Akkaya, M. *et al.* Second signals rescue B cells from activation-induced mitochondrial  
719 dysfunction and death. *Nat. Immunol.* **19**, 871–884 (2018).
- 720 54. Siffrin, V. *et al.* FRET based ratiometric Ca<sup>2+</sup> imaging to investigate immune-mediated  
721 neuronal and axonal damage processes in experimental autoimmune  
722 encephalomyelitis. *J. Neurosci. Methods* **249**, 8–15 (2015).
- 723 55. Radbruch, H. *et al.* Intravital FRET: Probing cellular and tissue function in Vivo. *Int. J.*  
724 *Mol. Sci. Int. J. Mol. Sci* **16**, 11713–11727 (2015).

- 725 56. Mayer, C. T. *et al.* The microanatomic segregation of selection by apoptosis in the  
726 germinal center. *Science* (80-. ). **358**, eaao2602 (2017).
- 727 57. Pone, E. J. *et al.* Toll-Like Receptors and B-Cell Receptors Synergize to Induce  
728 Immunoglobulin Class-Switch DNA Recombination: Relevance to Microbial Antibody  
729 Responses. *Crit. Rev. Immunol.* **30**, 1–29 (2010).
- 730 58. Pone, E. J. *et al.* BCR-signalling synergizes with TLR-signalling for induction of AID  
731 and immunoglobulin class-switching through the non-canonical NF- $\kappa$ B pathway. *Nat.*  
732 *Commun.* **3**, 712–767 (2012).
- 733 59. Eckl-Dorna, J. & Batista, F. D. BCR-mediated uptake of antigen linked to TLR9 ligand  
734 stimulates B-cell proliferation and antigen-specific plasma cell formation. *Blood* **113**,  
735 3969–3977 (2009).
- 736 60. Ruprecht, C. R. & Lanzavecchia, A. Toll-like receptor stimulation as a third signal  
737 required for activation of human naive B cells. *Eur. J. Immunol.* **36**, 810–816 (2006).
- 738 61. Nguyen, Y. H., Lee, K. Y., Kim, T. J., Kim, S. J. & Kang, T. M. CD40 co-stimulation  
739 inhibits sustained BCR-induced Ca<sup>2+</sup> signaling in response to long-term antigenic  
740 stimulation of immature B cells. *Korean J. Physiol. Pharmacol.* **15**, 179–187 (2011).
- 741 62. Weisel, F. J., Zuccarino-Catania, G. V., Chikina, M. & Shlomchik, M. J. A Temporal  
742 Switch in the Germinal Center Determines Differential Output of Memory B and  
743 Plasma Cells. *Immunity* **44**, 116–130 (2016).
- 744 63. Kass, G. E. N. & Orrenius, S. Calcium signaling and cytotoxicity. *Environ. Health*  
745 *Perspect.* **107**, 25–35 (1999).
- 746 64. Shanmugapriya, K., Kim, H. & Kang, H. W. In vitro antitumor potential of astaxanthin  
747 nanoemulsion against cancer cells via mitochondrial mediated apoptosis. *Int. J.*  
748 *Pharm.* **560**, 334–346 (2019).
- 749 65. Jang, H. D., Hwang, H. Z., Kim, H. S. & Lee, S. Y. C-Cbl negatively regulates TRAF6-  
750 mediated NF- $\kappa$ B activation by promoting K48-linked polyubiquitination of TRAF6. *Cell.*  
751 *Mol. Biol. Lett.* **24**, 1–13 (2019).
- 752 66. Mank, M. *et al.* A genetically encoded calcium indicator for chronic in vivo two-photon  
753 imaging. *Nat. Methods* **5**, 805–811 (2008).
- 754 67. Cossarizza, A. *et al.* Guidelines for the use of flow cytometry and cell sorting in  
755 immunological studies (second edition). *Eur. J. Immunol.* **49**, 1457–1973 (2019).

- 756 68. Rakhymzhan, A. *et al.* Synergistic Strategy for Multicolor Two-photon Microscopy:  
757 Application to the Analysis of Germinal Center Reactions in Vivo. *Sci. Rep.* **7**, (2017).
- 758 69. Leben, R., Köhler, M., Radbruch, H., Hauser, A. E. & Niesner, R. A. Systematic  
759 enzyme mapping of cellular metabolism by phasor-analyzed label-free NAD(P)H  
760 fluorescence lifetime imaging. *Int. J. Mol. Sci.* **20**, 1–19 (2019).

## 761 **Acknowledgements**

762 We thank Patrick Thiemann, Vivien Theissig and Manuela Ohde for animal caretaking. We  
763 thank Robert Günther for excellent surgical assistance and Peggy Mex for cell isolations and  
764 stainings. We thank Ralf Uecker for microscope facility services. Further thank goes to  
765 Mathis Richter for his help with SNR exclusion analysis and proofreading of the manuscript.  
766 This study has been supported by the DFG grant TRR130.

## 767 **Author contributions**

768 A.E.H, R.A.N. and C.U. designed the study and single experiments. F.K. kindly provided  
769 mice. C.U. and A.R. conducted experiments. R.L., A.R. and R.A.N. developed mathematical  
770 analysis strategies and provided bioinformatical support. L.N. supported with expertise in  
771 flow cytometric calcium flux measurements. H.R. provided help for general approach of  
772 GECl experiments. C.U., R.L., A.E.H. and R.A.N wrote the manuscript.

## 773 **Additional information**

774 Supplementary information is available for this paper.

775 Competing interest: The authors declare no competing financial interests.

776 Correspondence: All requests for additional information and material should be addressed to  
777 [hauser@drfz.de](mailto:hauser@drfz.de).

778 Reprints and permission information is available online at:

779 A preprint of this paper is available at bioRxiv: <https://doi.org/10.1101/2019.12.13.872820>
